# Supplementary material for: Surveillance of First-Generation H1-Antihistamine Use for Older Patients with Dementia in Japan: A Retrospective Cohort Study
Source: Hindawi journal article supplement (doi:10.1155/2018/3406210), 2018-07-02
Supplement: f1 [file 3406210.f1.pdf]

1

2   Supplementary Table1. List of first-generation H1-antihistamine drugs used for

3   analyses

4

---

Diphenhydramine hydrochloride

Clemastine fumarate

dl-chlorpheniramine maleate

d-chlorpheniramine maleate

Triprolidine hydrochloride hydrate

Alimemazine tartrate

Hydroxyzine

Homochlorcyclizine hydrochloride

Cyproheptadine hydrochloride

---

5

6

7

8

9

# Supplementary Table2. Rate, crude, and adjusted odds ratio of first-generation

## H1-antihistamine use

|                                  | N     | %    | OR    | 95%CI     |       | p      | AOR   | 95%CI     |       | p      |
|----------------------------------|-------|------|-------|-----------|-------|--------|-------|-----------|-------|--------|
| Gender                           |       |      |       |           |       |        |       |           |       |        |
| Male                             | 6332  | 27.4 |       | Reference |       |        |       | Reference |       |        |
| Female                           | 18417 | 34.2 | 1.38  | 1.33      | 1.42  | <0.001 | 1.43  | 1.23      | 1.65  | <0.001 |
| Age                              |       |      |       |           |       |        |       |           |       |        |
| 75-79                            | 4962  | 34.6 |       | Reference |       |        |       | Reference |       |        |
| 80-84                            | 8100  | 33.2 | 0.94  | 0.90      | 0.98  | 0.004  | 0.91  | 0.78      | 1.07  | 0.251  |
| 85-89                            | 7244  | 31.8 | 0.88  | 0.84      | 0.92  | <0.001 | 0.84  | 0.70      | 1.01  | 0.061  |
| 90-                              | 4443  | 28.7 | 0.76  | 0.72      | 0.80  | <0.001 | 0.73  | 0.59      | 0.91  | 0.004  |
| Disease                          |       |      |       |           |       |        |       |           |       |        |
| Allergic rhinitis                | 450   | 21.4 | 0.57  | 0.51      | 0.63  | <0.001 | 0.25  | 0.20      | 0.30  | <0.001 |
| Asthma                           | 153   | 57.1 | 2.82  | 2.21      | 3.59  | <0.001 | 2.93  | 1.75      | 4.91  | <0.001 |
| Eczema                           | 97    | 14.2 | 0.35  | 0.28      | 0.43  | <0.001 | 0.36  | 0.26      | 0.50  | <0.001 |
| Urticaria                        | 31    | 13.4 | 0.33  | 0.22      | 0.48  | <0.001 | 0.33  | 0.19      | 0.57  | <0.001 |
| Pruritus                         | 65    | 14.3 | 0.35  | 0.27      | 0.46  | <0.001 | 0.48  | 0.30      | 0.77  | 0.002  |
| URI                              | 6365  | 80.0 | 11.02 | 10.41     | 11.68 | <0.001 | 14.84 | 12.98     | 16.97 | <0.001 |
| Medication                       |       |      |       |           |       |        |       |           |       |        |
| Antidementia                     | 10422 | 30.0 | 0.84  | 0.81      | 0.86  | <0.001 | 0.78  | 0.68      | 0.90  | 0.001  |
| Comorbidities                    |       |      |       |           |       |        |       |           |       |        |
| Acute myocardial infarction      | 250   | 33.7 | 1.08  | 0.92      | 1.25  | 0.350  | 1.03  | 0.64      | 1.67  | 0.903  |
| Cerebrovascular accident         | 7353  | 31.9 | 0.98  | 0.95      | 1.02  | 0.337  | 1.03  | 0.88      | 1.20  | 0.712  |
| Collagen disease                 | 282   | 33.0 | 1.04  | 0.90      | 1.20  | 0.597  | 1.01  | 0.50      | 2.05  | 0.980  |
| Congestive heart failure         | 2752  | 27.1 | 0.76  | 0.72      | 0.80  | <0.001 | 0.73  | 0.59      | 0.90  | 0.004  |
| Diabetes no complication         | 56    | 33.5 | 1.07  | 0.77      | 1.47  | 0.700  | 0.91  | 0.41      | 2.02  | 0.820  |
| Diabetes with complication       | 165   | 32.8 | 1.03  | 0.86      | 1.24  | 0.750  | 1.07  | 0.61      | 1.90  | 0.810  |
| Hemipalysis                      | 53    | 33.3 | 1.06  | 0.76      | 1.47  | 0.747  | 1.17  | 0.47      | 2.96  | 0.733  |
| Metastatic malignancy            | 53    | 41.7 | 1.51  | 1.06      | 2.15  | 0.021  | 1.28  | 0.53      | 3.10  | 0.578  |
| Mild liver disease               | 654   | 40.3 | 1.44  | 1.30      | 1.59  | <0.001 | 1.87  | 0.97      | 3.60  | 0.063  |
| Moderate to severe liver disease | 21    | 24.1 | 0.67  | 0.41      | 1.10  | 0.112  | 0.39  | 0.12      | 1.26  | 0.117  |
| Peptic ulcer                     | 1787  | 32.6 | 1.02  | 0.96      | 1.08  | 0.448  | 0.95  | 0.70      | 1.29  | 0.762  |
| Renal disease                    | 494   | 27.1 | 0.78  | 0.70      | 0.87  | <0.001 | 0.84  | 0.57      | 1.24  | 0.374  |
| Peripheral vascular disease      | 342   | 25.6 | 0.72  | 0.64      | 0.82  | <0.001 | 0.63  | 0.36      | 1.10  | 0.103  |
| Primary neoplasm                 | 695   | 27.1 | 0.78  | 0.71      | 0.85  | <0.001 | 0.78  | 0.54      | 1.12  | 0.174  |
| Pulmonary disease                | 3492  | 29.8 | 0.88  | 0.84      | 0.92  | <0.001 | 0.83  | 0.68      | 1.02  | 0.076  |
| Number of bed                    |       |      |       |           |       |        |       |           |       |        |
| 0-19                             | 13428 | 29.6 |       | Reference |       |        |       | Reference |       |        |
| 20-199                           | 5025  | 34.3 | 1.24  | 1.19      | 1.29  | <0.001 | 1.40  | 1.17      | 1.68  | <0.001 |
| 200-                             | 6296  | 37.2 | 1.41  | 1.36      | 1.46  | <0.001 | 1.55  | 1.30      | 1.85  | <0.001 |
| Fiscal year                      |       |      |       |           |       |        |       |           |       |        |
| 2010                             | 4840  | 36.0 |       | Reference |       |        |       | Reference |       |        |
| 2011                             | 6069  | 34.8 | 0.95  | 0.91      | 0.99  | 0.029  | 0.97  | 0.87      | 1.08  | 0.605  |
| 2012                             | 6774  | 31.6 | 0.82  | 0.79      | 0.86  | <0.001 | 0.87  | 0.77      | 1.00  | 0.045  |
| 2013                             | 7066  | 28.7 | 0.71  | 0.68      | 0.75  | <0.001 | 0.78  | 0.68      | 0.89  | <0.001 |
| STM                              |       |      |       |           |       |        |       |           |       |        |
| 1                                | 5908  | 28.9 | 1.40  | 1.30      | 1.51  | <0.001 | 1.37  | 0.98      | 1.93  | 0.069  |
| 2                                | 1026  | 37.3 | 2.06  | 1.86      | 2.28  | <0.001 | 1.97  | 1.26      | 3.08  | 0.003  |
| 3                                | 444   | 32.8 | 1.68  | 1.48      | 1.92  | <0.001 | 1.47  | 0.82      | 2.65  | 0.199  |
| 4                                | 1466  | 34.0 | 1.78  | 1.62      | 1.95  | <0.001 | 1.82  | 1.21      | 2.76  | 0.004  |
| 5                                | 473   | 30.3 | 1.50  | 1.33      | 1.71  | <0.001 | 1.29  | 0.68      | 2.43  | 0.438  |
| 6                                | 1518  | 29.0 | 1.41  | 1.29      | 1.54  | <0.001 | 1.24  | 0.84      | 1.82  | 0.273  |
| 7                                | 1168  | 36.5 | 1.99  | 1.80      | 2.19  | <0.001 | 2.15  | 1.31      | 3.53  | 0.002  |
| 8                                | 1129  | 22.5 |       | Reference |       |        |       | Reference |       |        |
| 9                                | 1380  | 38.9 | 2.20  | 2.00      | 2.42  | <0.001 | 1.75  | 1.12      | 2.73  | 0.015  |
| 10                               | 501   | 31.2 | 1.57  | 1.38      | 1.78  | <0.001 | 1.61  | 0.97      | 2.67  | 0.067  |
| 11                               | 1181  | 37.3 | 2.06  | 1.87      | 2.27  | <0.001 | 1.36  | 0.89      | 2.09  | 0.159  |
| 12                               | 6938  | 34.1 | 1.79  | 1.67      | 1.92  | <0.001 | 1.69  | 1.21      | 2.37  | 0.002  |
| 13                               | 1617  | 36.2 | 1.96  | 1.79      | 2.14  | <0.001 | 1.71  | 1.02      | 2.85  | 0.040  |
| Total                            | 24749 | 32.1 |       |           |       |        |       |           |       |        |

URI: Upper respiratory infection, STM: secondary tier of medical care

# Supplementary Table3. Rate, crude and adjusted odds ratio of first-generation

## H1-antihistamine use after excluding cold medication

|                                  | N    | %    | OR   | 95%CI     |      | p      | AOR  | 95%CI     |      | p      |
|----------------------------------|------|------|------|-----------|------|--------|------|-----------|------|--------|
| Gender                           |      |      |      |           |      |        |      |           |      |        |
| Male                             | 1988 | 10.6 |      | Reference |      |        |      | Reference |      |        |
| Female                           | 5277 | 13.0 | 1.26 | 1.19      | 1.33 | <0.001 | 1.26 | 0.96      | 1.65 | 0.090  |
| Age                              |      |      |      |           |      |        |      |           |      |        |
| 75–79                            | 1319 | 12.3 |      | Reference |      |        |      | Reference |      |        |
| 80–84                            | 2090 | 11.4 | 0.91 | 0.85      | 0.98 | 0.012  | 0.91 | 0.67      | 1.22 | 0.516  |
| 85–89                            | 2241 | 12.6 | 1.02 | 0.95      | 1.10 | 0.511  | 1.01 | 0.72      | 1.41 | 0.956  |
| 90–                              | 1615 | 12.8 | 1.04 | 0.96      | 1.12 | 0.326  | 1.02 | 0.70      | 1.49 | 0.898  |
| Disease                          |      |      |      |           |      |        |      |           |      |        |
| Allergic rhinitis                | 131  | 7.3  | 0.56 | 0.47      | 0.67 | <0.001 | 0.51 | 0.39      | 0.67 | <0.001 |
| Asthma                           | 64   | 35.8 | 4.03 | 2.97      | 5.48 | <0.001 | 4.27 | 2.27      | 8.03 | <0.001 |
| Eczema                           | 47   | 7.4  | 0.58 | 0.43      | 0.78 | <0.001 | 0.63 | 0.40      | 0.99 | 0.045  |
| Urticaria                        | 21   | 9.5  | 0.75 | 0.48      | 1.18 | 0.220  | 0.83 | 0.46      | 1.50 | 0.544  |
| Pruritus                         | 31   | 7.4  | 0.57 | 0.40      | 0.83 | 0.003  | 0.65 | 0.38      | 1.09 | 0.105  |
| URI                              | 363  | 18.6 | 1.67 | 1.49      | 1.88 | <0.001 | 2.04 | 1.60      | 2.60 | <0.001 |
| Medication                       |      |      |      |           |      |        |      |           |      |        |
| Antidementia                     | 2765 | 10.2 | 0.71 | 0.67      | 0.74 | <0.001 | 0.75 | 0.58      | 0.96 | 0.021  |
| Comorbidities                    |      |      |      |           |      |        |      |           |      |        |
| Acute myocardial infarction      | 42   | 7.9  | 0.61 | 0.45      | 0.84 | 0.002  | 0.65 | 0.31      | 1.36 | 0.253  |
| Cerebrovascular accident         | 904  | 10.9 | 1.06 | 1.01      | 1.12 | 0.030  | 1.10 | 0.84      | 1.46 | 0.487  |
| Collagen disease                 | 129  | 18.4 | 1.63 | 1.34      | 1.98 | <0.001 | 1.42 | 0.47      | 4.25 | 0.530  |
| Congestive heart failure         | 2274 | 12.7 | 0.86 | 0.80      | 0.93 | <0.001 | 0.80 | 0.55      | 1.17 | 0.251  |
| Diabetes no complication         | 35   | 9.4  | 0.52 | 0.25      | 1.06 | 0.072  | 0.54 | 0.10      | 3.01 | 0.483  |
| Diabetes with complication       | 6    | 5.4  | 0.74 | 0.52      | 1.05 | 0.096  | 0.92 | 0.38      | 2.21 | 0.845  |
| Hemipalysis                      | 9    | 10.8 | 0.41 | 0.18      | 0.93 | 0.032  | 0.37 | 0.04      | 3.48 | 0.383  |
| Metastatic malignancy            | 8    | 6.7  | 0.87 | 0.44      | 1.75 | 0.704  | 0.78 | 0.10      | 6.28 | 0.818  |
| Mild liver disease               | 345  | 26.3 | 2.64 | 2.33      | 2.99 | <0.001 | 3.62 | 1.56      | 8.38 | 0.003  |
| Moderate to severe liver disease | 0    | 0.0  |      | –         |      |        |      |           |      |        |
| Peptic ulcer                     | 456  | 11.0 | 0.88 | 0.80      | 0.97 | 0.013  | 0.81 | 0.46      | 1.45 | 0.478  |
| Renal disease                    | 217  | 10.4 | 0.91 | 0.78      | 1.07 | 0.272  | 1.00 | 0.49      | 2.05 | 0.998  |
| Peripheral vascular disease      | 952  | 10.4 | 0.59 | 0.47      | 0.74 | <0.001 | 0.51 | 0.20      | 1.33 | 0.171  |
| Primary neoplasm                 | 82   | 7.6  | 0.83 | 0.72      | 0.96 | 0.010  | 0.93 | 0.46      | 1.88 | 0.833  |
| Pulmonary disease                | 169  | 11.3 | 0.81 | 0.75      | 0.87 | <0.001 | 0.81 | 0.56      | 1.17 | 0.266  |
| Number of bed                    |      |      |      |           |      |        |      |           |      |        |
| 0–19                             | 3706 | 10.4 |      | Reference |      |        |      | Reference |      |        |
| 20–199                           | 1823 | 15.9 | 1.63 | 1.54      | 1.74 | <0.001 | 1.62 | 1.20      | 2.20 | 0.002  |
| 200–                             | 1736 | 14.0 | 1.41 | 1.33      | 1.50 | <0.001 | 1.23 | 0.87      | 1.75 | 0.244  |
| Fiscal year                      |      |      |      |           |      |        |      |           |      |        |
| 2010                             | 1433 | 14.3 |      | Reference |      |        |      | Reference |      |        |
| 2011                             | 1785 | 13.6 | 0.94 | 0.87      | 1.02 | 0.123  | 0.96 | 0.79      | 1.16 | 0.665  |
| 2012                             | 2006 | 12.0 | 0.82 | 0.76      | 0.88 | <0.001 | 0.87 | 0.68      | 1.11 | 0.259  |
| 2013                             | 2041 | 10.4 | 0.70 | 0.65      | 0.75 | <0.001 | 0.76 | 0.59      | 0.98 | 0.034  |
| STM                              |      |      |      |           |      |        |      |           |      |        |
| 1                                | 1336 | 8.4  |      | Reference |      |        |      | Reference |      |        |
| 2                                | 390  | 18.5 | 2.46 | 2.18      | 2.79 | <0.001 | 2.67 | 1.50      | 4.74 | 0.001  |
| 3                                | 132  | 12.7 | 1.58 | 1.30      | 1.91 | <0.001 | 1.53 | 0.56      | 4.16 | 0.406  |
| 4                                | 423  | 12.9 | 1.62 | 1.44      | 1.81 | <0.001 | 1.80 | 1.01      | 3.22 | 0.047  |
| 5                                | 169  | 13.5 | 1.69 | 1.43      | 2.01 | <0.001 | 1.56 | 0.72      | 3.38 | 0.260  |
| 6                                | 520  | 12.3 | 1.52 | 1.37      | 1.69 | <0.001 | 1.50 | 0.92      | 2.42 | 0.100  |
| 7                                | 541  | 21.1 | 2.90 | 2.60      | 3.24 | <0.001 | 3.54 | 1.94      | 6.46 | <0.001 |
| 8                                | 464  | 10.6 | 1.30 | 1.16      | 1.45 | <0.001 | 1.17 | 0.69      | 1.99 | 0.562  |
| 9                                | 396  | 15.5 | 1.99 | 1.76      | 2.25 | <0.001 | 2.03 | 1.13      | 3.67 | 0.019  |
| 10                               | 197  | 15.2 | 1.94 | 1.65      | 2.29 | <0.001 | 1.77 | 0.91      | 3.42 | 0.092  |
| 11                               | 296  | 13.0 | 1.62 | 1.42      | 1.86 | <0.001 | 1.49 | 0.80      | 2.80 | 0.212  |
| 12                               | 1789 | 11.8 | 1.46 | 1.35      | 1.57 | <0.001 | 1.44 | 1.00      | 2.10 | 0.053  |
| 13                               | 612  | 17.7 | 2.34 | 2.11      | 2.59 | <0.001 | 2.13 | 1.06      | 4.29 | 0.035  |
| Total                            | 7265 | 12.2 |      |           |      |        |      |           |      |        |

URI: Upper respiratory infection, STM: Secondary tier of medical care
